# Supplementary material for: Polymorphic and solvate structures of ethyl ester and carboxylic acid derivatives of WIN 61893 analogue and their stability in solution
Source: Royal Society of Chemistry journal article supplement (doi:10.1039/c4ce01152j), 2014-01-01
Supplement: c4ce01152j1.pdf [file c4ce01152j1.pdf]

Supporting information for

## Polymorphic and solvate structures of ethyl ester and carboxylic acid derivatives of WIN 61893 analogue and their stability in solution

Kirsi Salorinne,<sup>a\*</sup> Tanja Lahtinen<sup>a</sup>, Varpu Marjomäki<sup>b</sup> and Hannu Häkkinen<sup>a,c</sup>

Departments of Chemistry<sup>a</sup>, Biology and Environmental Sciences<sup>b</sup>, and Physics<sup>†</sup>, Nanoscience Center, University of Jyväskylä, P.O. Box 35, 40014 JYU, Finland

### Synthesis of the WIN 61893 derivatives

Synthesis of the WIN 61893 derivatives **1** and **2** was accomplished by following a previously reported protocol (Scheme S1).<sup>1</sup> Shortly, nucleophilic substitution reaction of 3,5-dimethyl-4-hydroxybenzonitrile with 5-chloro-1-pentyne first produces the intermediate nitrile **4** in the presence of K<sub>2</sub>CO<sub>3</sub>/KI in DMF at 75°C with good yields. The subsequent treatment of nitrile **4** with hydroxylamine first gives amidoxime, which then upon acylation reaction with acetyl chloride affords the oxadiazole **5**. Noteworthy is the [3+2] cycloaddition reaction to produce the isoxazole **1**, which is accomplished by the reaction of the oxadiazole **5** with nitrile oxide obtained in situ from a reaction of chlorooximidoacetate<sup>2</sup> and triethylamine. Basic hydrolysis of the ester functionalized isoxazole **1** then finally affords the terminal carboxylic acid containing isoxazole **2**.

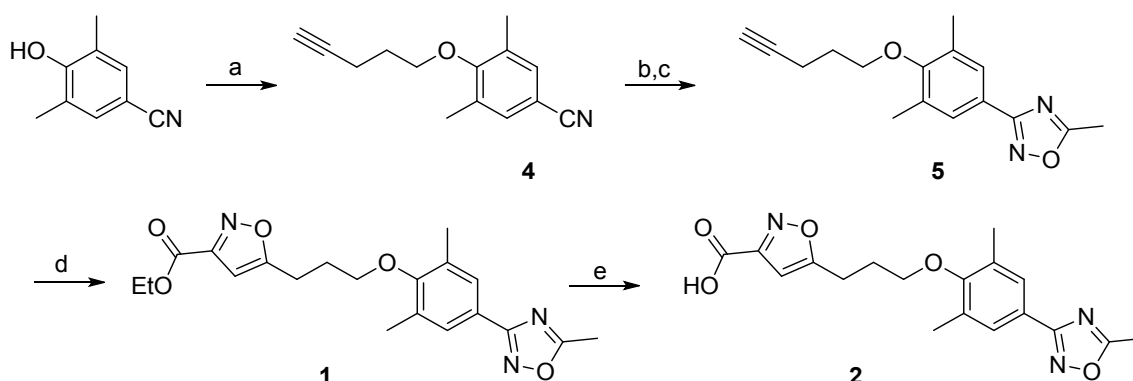

Scheme S1. Synthesis scheme for the preparation of pleconaril derivatives **1** and **2**: a) K<sub>2</sub>CO<sub>3</sub>/KI, DMF, 75°C, b) NH<sub>2</sub>OH-HCl, K<sub>2</sub>CO<sub>3</sub>, EtOH, reflux, c) acetyl chloride, pyridine, reflux, d) chlorooximidoacetate, Et<sub>3</sub>N, DMF, 90°C, e) aq NaOH, ethanol-H<sub>2</sub>O 1:1, reflux, f) NaNO<sub>2</sub>, conc HCl, H<sub>2</sub>O, -5°C.

- 1 Y. Chen, W. Zhang, X. Chen, J. Wang and P. G. Wang, *J. Chem. Soc., Perkin Trans. 1*, 2001, 1716
- 2 A. P. Kozikowski and M. Adamczyk, *J. Org. Chem.*, 1983, **48**, 366

$^1\text{H}$  and  $^{13}\text{C}$  NMR spectra

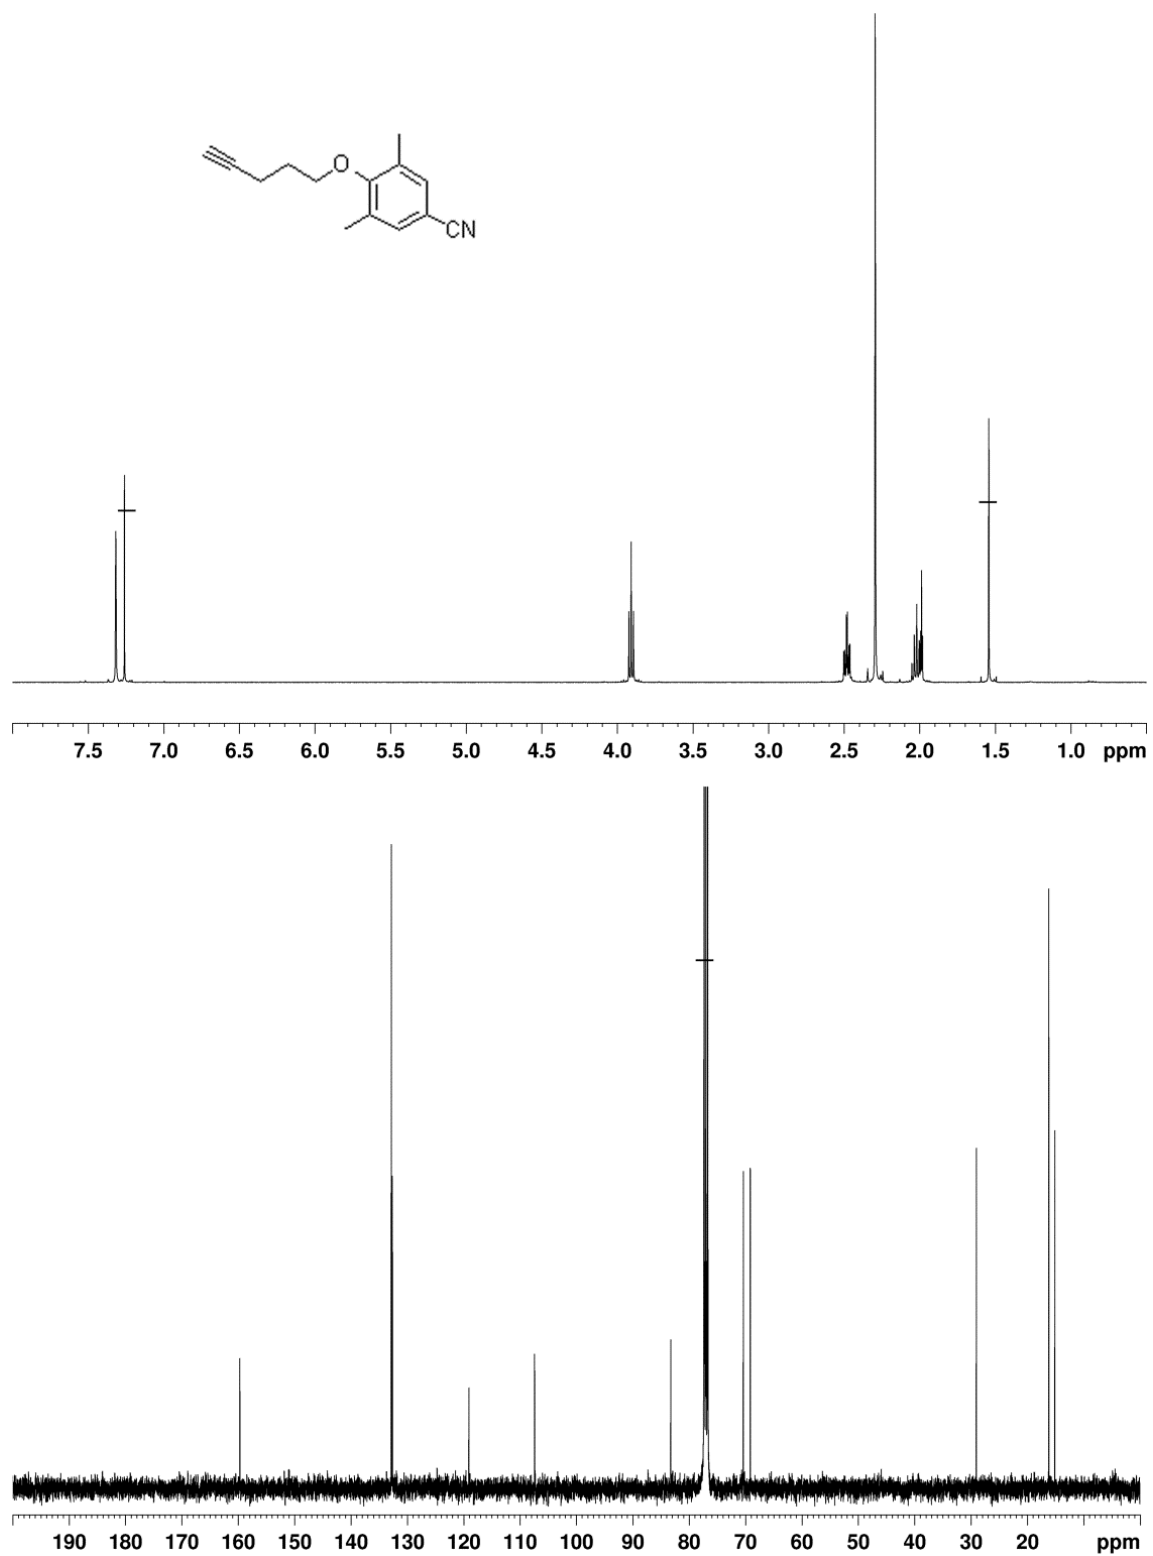

Figure S1.  $^1\text{H}$  and  $^{13}\text{C}$  NMR spectra of intermediate **4** in  $\text{CDCl}_3$  at  $30^\circ\text{C}$ .

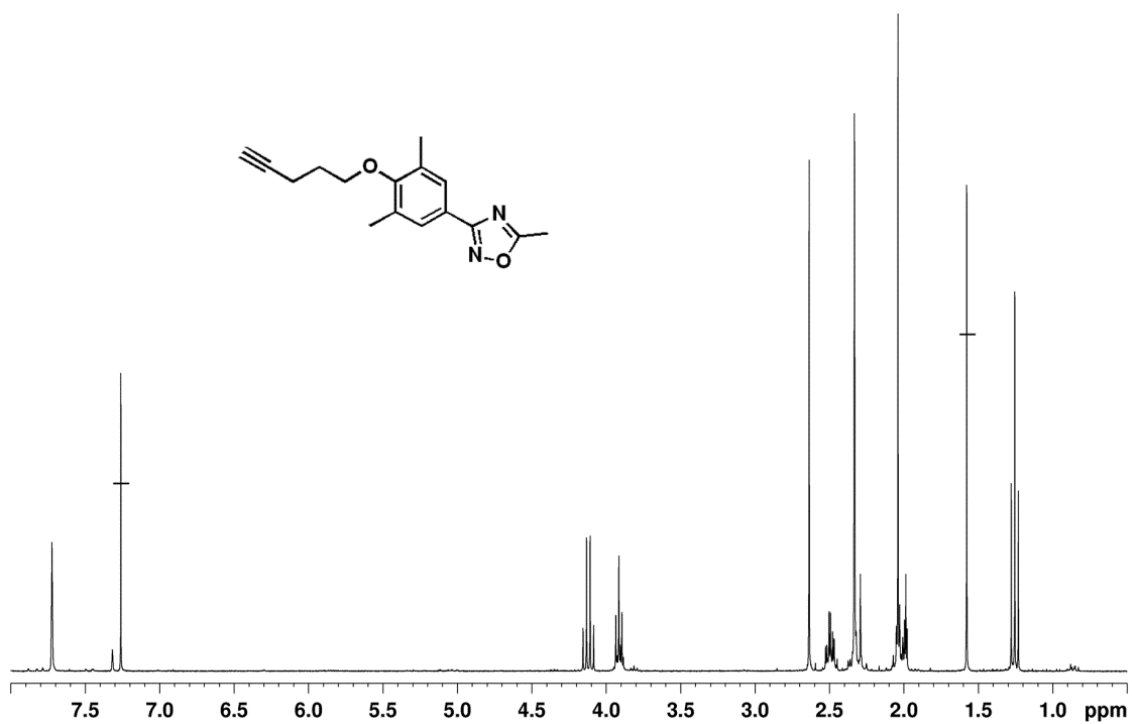

Figure S2. <sup>1</sup>H NMR spectrum of intermediate 5 in CDCl<sub>3</sub> at 30°C. Chemical shifts marked with (\*) belong to residual ethyl acetate.

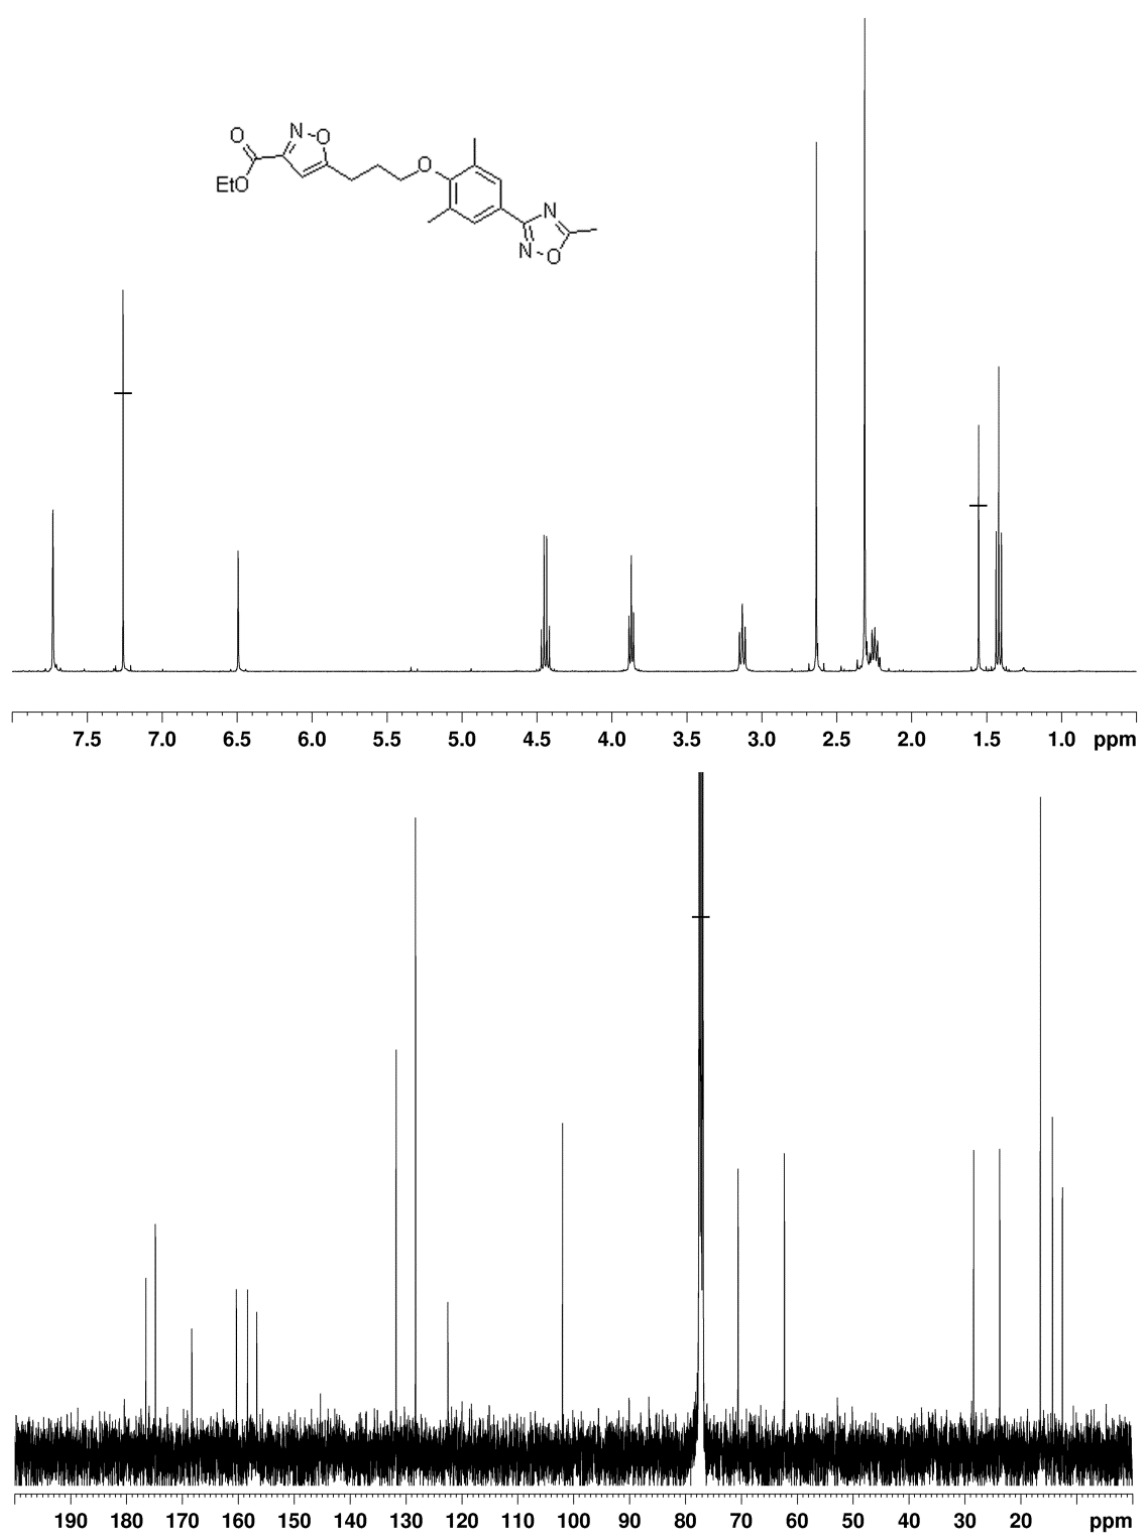

Figure S3.  $^1\text{H}$  and  $^{13}\text{C}$  NMR spectra of ethyl ester derivative **1** in  $\text{CDCl}_3$  at  $30^\circ\text{C}$ .

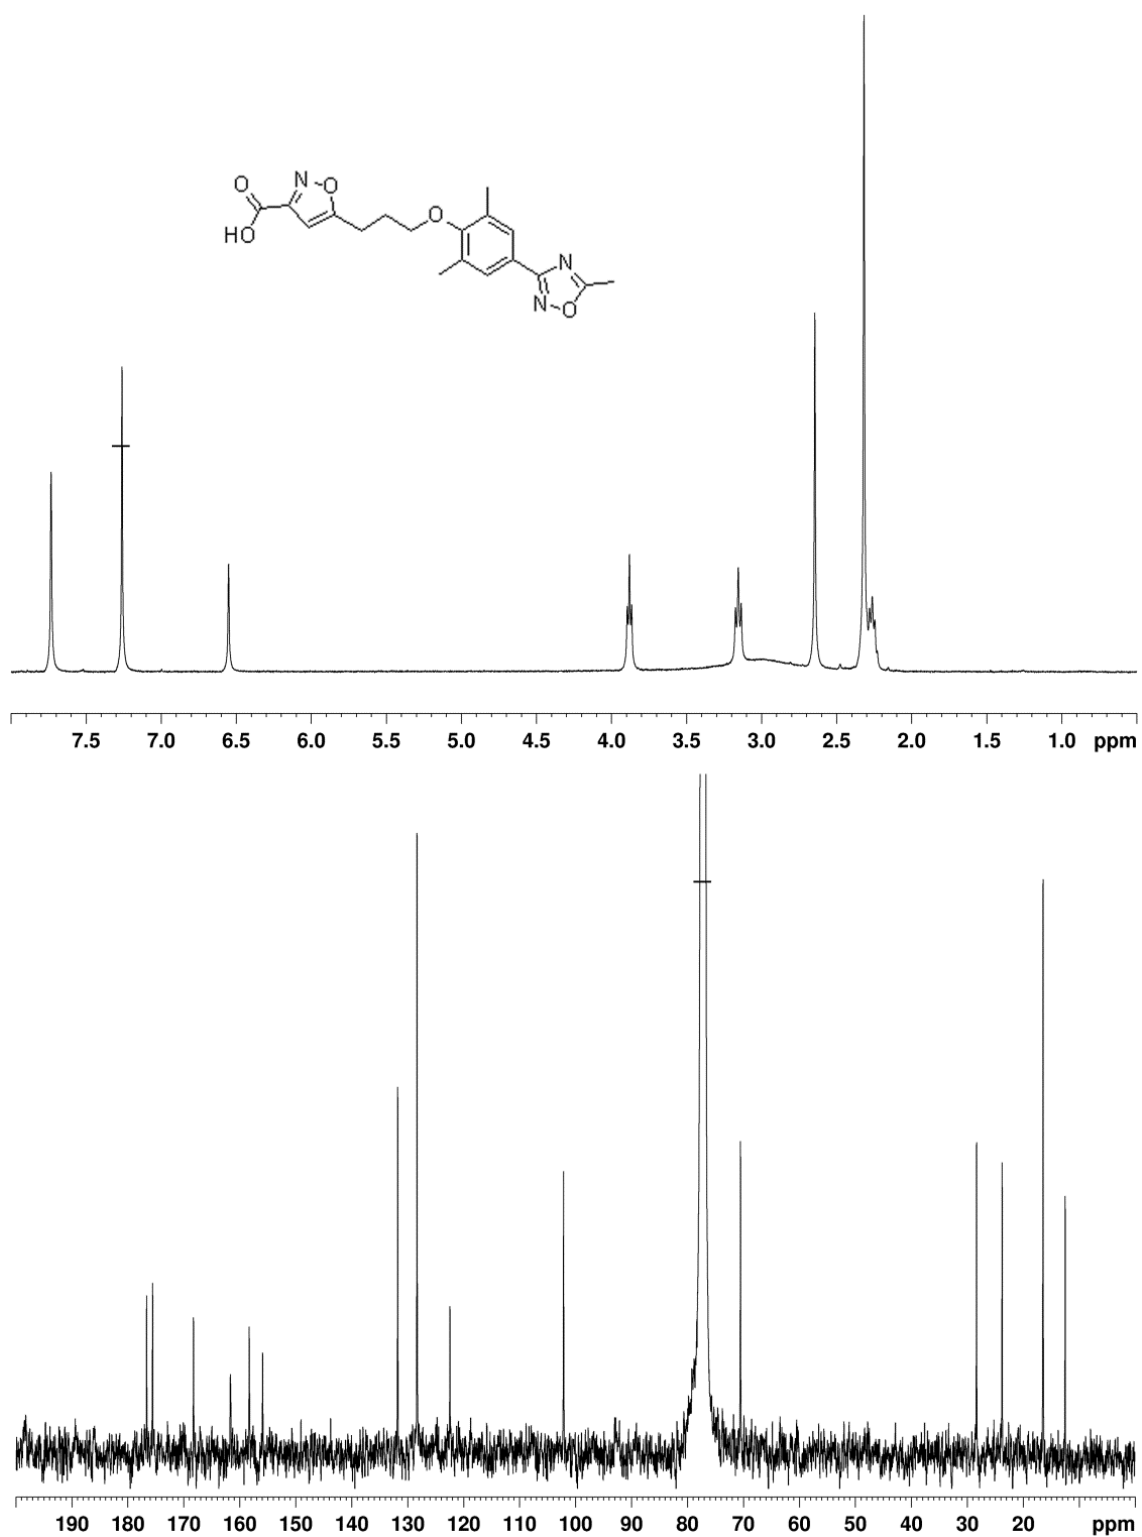

Figure S4.  $^1\text{H}$  and  $^{13}\text{C}$  NMR spectra of carboxylic acid derivative **2** in  $\text{CDCl}_3$  at  $30^\circ\text{C}$ .

## Crystallographic data and details

Table S1. Crystallographic details for derivatives **1** and **2** structures.

|                                                                         | 1-form I                                                      | 1-form II                                                     | 2-EtOH                                                                                              | 2-DMSO                                                                                          |
|-------------------------------------------------------------------------|---------------------------------------------------------------|---------------------------------------------------------------|-----------------------------------------------------------------------------------------------------|-------------------------------------------------------------------------------------------------|
| Compound                                                                | <b>1</b>                                                      | <b>1</b>                                                      | <b>2</b>                                                                                            | <b>2</b>                                                                                        |
| Crystallization                                                         | CH <sub>2</sub> Cl <sub>2</sub> -Hexane (se) <sup>a</sup>     | MeOH (sce)                                                    | EtOH (se)                                                                                           | DMSO (vd H <sub>2</sub> O)                                                                      |
| Crystal morphology                                                      | plate                                                         | block                                                         | plate (sheets)                                                                                      | long needles                                                                                    |
| Composition                                                             | C <sub>20</sub> H <sub>23</sub> N <sub>3</sub> O <sub>5</sub> | C <sub>20</sub> H <sub>23</sub> N <sub>3</sub> O <sub>5</sub> | 2 (C <sub>18</sub> H <sub>19</sub> N <sub>3</sub> O <sub>5</sub> ·C <sub>2</sub> H <sub>5</sub> OH) | C <sub>18</sub> H <sub>19</sub> N <sub>3</sub> O <sub>5</sub> ·C <sub>2</sub> H <sub>6</sub> SO |
| Formula weight (g mol <sup>-1</sup> )                                   | 385.41                                                        | 385.41                                                        | 806.86                                                                                              | 435.49                                                                                          |
| Crystal system                                                          | Monoclinic                                                    | Monoclinic                                                    | Monoclinic                                                                                          | Monoclinic                                                                                      |
| Space group                                                             | P2 <sub>1</sub> /n                                            | P2 <sub>1</sub> /c                                            | P2 <sub>1</sub> /c                                                                                  | P2 <sub>1</sub> /c                                                                              |
| <i>a</i> (Å)                                                            | 7.8644(2)                                                     | 18.6194(5)                                                    | 8.3029(3)                                                                                           | 13.7775(3)                                                                                      |
| <i>b</i> (Å)                                                            | 23.7196(5)                                                    | 8.3392(2)                                                     | 45.516(2)                                                                                           | 7.2131(1)                                                                                       |
| <i>c</i> (Å)                                                            | 10.4242(2)                                                    | 12.7669(3)                                                    | 11.0152(4)                                                                                          | 21.4071(3)                                                                                      |
| $\beta$ (°)                                                             | 96.213(3)                                                     | 100.331(3)                                                    | 103.692(4)                                                                                          | 90.490(2)                                                                                       |
| <i>V</i> (Å <sup>3</sup> )                                              | 1933.11(7)                                                    | 1950.19(8)                                                    | 4044.5(3)                                                                                           | 2127.32(6)                                                                                      |
| <i>Z</i>                                                                | 4                                                             | 4                                                             | 4                                                                                                   | 4                                                                                               |
| <i>d</i> <sub>calc</sub> (g cm <sup>-3</sup> )                          | 1.324                                                         | 1.313                                                         | 1.325                                                                                               | 1.360                                                                                           |
| $\mu$ [Mo K $\alpha$ ] (mm <sup>-1</sup> )                              | 0.096                                                         | 0.096                                                         | 0.099                                                                                               | 0.194                                                                                           |
| <i>F</i> (000)                                                          | 816                                                           | 816                                                           | 1712                                                                                                | 920                                                                                             |
| Crystal size (mm <sup>3</sup> )                                         | 0.11 × 0.12 × 0.17                                            | 0.13 × 0.19 × 0.24                                            | 0.05 × 0.12 × 0.25                                                                                  | 0.08 × 0.12 × 0.22                                                                              |
| $\theta$ range (°)                                                      | 2.14 to 30.69                                                 | 2.22 to 30.60                                                 | 1.79 to 28.78                                                                                       | 1.90 to 30.61                                                                                   |
| Reflections collected                                                   | 11637                                                         | 10497                                                         | 18378                                                                                               | 11563                                                                                           |
| Independent reflections                                                 | 5318 (R <sub>int</sub> =0.0202)                               | 5164 (R <sub>int</sub> =0.0420)                               | 9215 (R <sub>int</sub> =0.0267)                                                                     | 5806 (R <sub>int</sub> =0.0182)                                                                 |
| Restraints/parameters                                                   | 0, 257                                                        | 0, 257                                                        | 0, 535                                                                                              | 0, 277                                                                                          |
| GOF on <i>F</i> <sup>2</sup>                                            | 1.053                                                         | 1.025                                                         | 1.063                                                                                               | 1.048                                                                                           |
| Final <i>R</i> indices [ <i>I</i> >2 $\sigma$ ( <i>I</i> )],<br>R1, wR2 | 0.0530, 0.1184                                                | 0.0596, 0.1498                                                | 0.0593, 0.1245                                                                                      | 0.0446, 0.1137                                                                                  |
| <i>R</i> indices (all data), R1,<br>wR2                                 | 0.0825, 0.1328                                                | 0.0840, 0.1674                                                | 0.0931, 0.1408                                                                                      | 0.0607, 0.1245                                                                                  |
| Largest difference peak<br>and hole (e Å <sup>-3</sup> )                | 0.202, -0.221                                                 | 0.290, -0.275                                                 | 0.295, -0.249                                                                                       | 0.313, -0.350                                                                                   |
| CCDC number                                                             | 999254                                                        | 999255                                                        | 999256                                                                                              | 999257                                                                                          |

vd = vapor diffusion, sce = slow cooling and evaporation, se = slow evaporation; <sup>a</sup> same unit cell was obtained from hot MeOH or EtOH (vd H<sub>2</sub>O) solutions as well.

## Stability of WIN 61893 derivatives **1** and **2** in solution

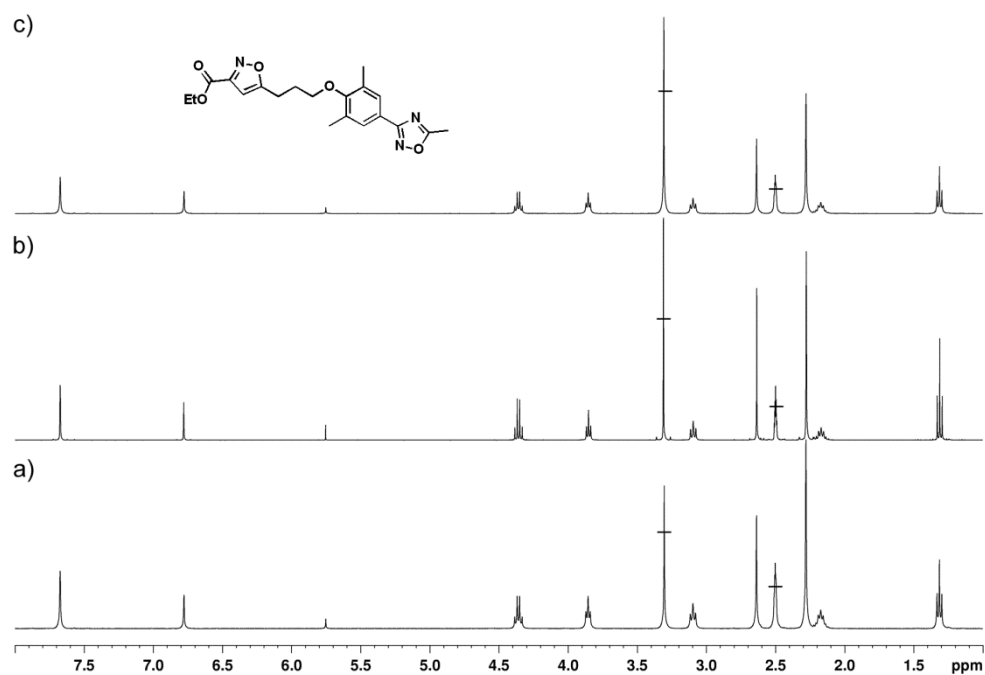

Figure S5. Time dependent  $^1\text{H}$  NMR spectra of ethyl ester (**1**) derivative in  $\text{DMSO-d}_6$  at  $30^\circ\text{C}$  measured over several days: a) freshly prepared sample, b) after 8 days and c) after 15 days showing no isoxazole ring opening.

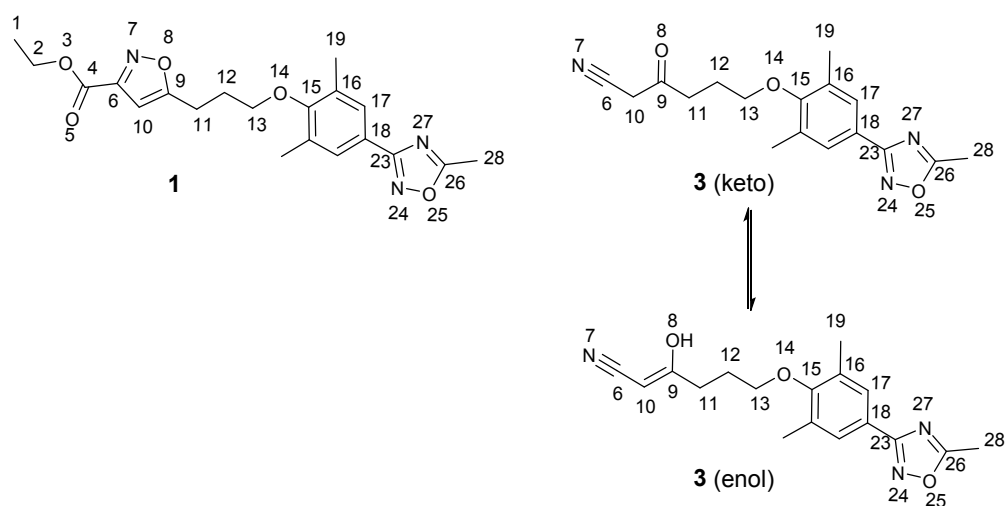

Scheme S2. Numbering scheme used for the NMR chemical shift assignment of derivatives **1** – **3** (adopted from the crystallographic numbering scheme).

Table S2. <sup>1</sup>H and <sup>13</sup>C NMR chemical shift assignment of the WIN 61893 derivatives **1** – **2** and the ring opening product **3** in DMSO-d<sub>6</sub> at 30°C.<sup>a</sup>

| atom # | <sup>1</sup> H chemical shift (ppm) |             |             | <sup>13</sup> C chemical shift (ppm) |                      |                                    |
|--------|-------------------------------------|-------------|-------------|--------------------------------------|----------------------|------------------------------------|
|        | <b>1</b>                            | <b>2</b>    | <b>3</b>    | <b>1</b>                             | <b>2<sup>b</sup></b> | <b>3</b>                           |
| 1      | 1.31                                | –           | –           | 13.9                                 | –                    | –                                  |
| 2      | 4.36                                | –           | –           | 61.7                                 | –                    | –                                  |
| 4      | –                                   | –           | –           | 175.2                                | 175.5                | –                                  |
| 6      | –                                   | –           | –           | <b>157.9</b>                         | <b>158.3</b>         | <b>115.5 (CN)</b>                  |
| 9      | –                                   | –           | –           | <b>159.5</b>                         | <b>161.7</b>         | <b>199.5 (C=O) keto</b>            |
| 10     | <b>6.78</b>                         | <b>6.70</b> | <b>4.09</b> | <b>101.8</b>                         | <b>102.1</b>         | <b>37.9 (CH<sub>2</sub>-) keto</b> |
| 11     | 3.09                                | 3.08        | 2.76        | 22.8                                 | 23.8                 | 23.7                               |
| 12     | 2.17                                | 2.17        | 1.97        | 27.6                                 | 28.4                 | 31.9                               |
| 13     | 3.85                                | 3.85        | 3.78        | 70.4                                 | 70.5                 | 70.7                               |
| 15     | –                                   | –           | –           | 156.1                                | 155.9                | 158.0                              |
| 16     | –                                   | –           | –           | 131.5                                | 131.7                | 131.5                              |
| 17     | 7.67                                | 7.67        | 7.67        | 127.5                                | 128.3                | 127.4                              |
| 18     | –                                   | –           | –           | 121.6                                | 122.4                | 121.5                              |
| 19     | 2.28                                | 2.28        | 2.28        | 15.9                                 | 16.5                 | 15.9                               |
| 23     | –                                   | –           | –           | 167.3                                | 168.2                | 167.3                              |
| 26     | –                                   | –           | –           | 177.1                                | 176.6                | 177.1                              |
| 28     | 2.64                                | 2.64        | 2.64        | 11.9                                 | 12.5                 | 11.9                               |

<sup>a</sup> Most significant changes in the chemical shifts have been highlighted with blue color. <sup>b</sup> Measured in CDCl<sub>3</sub>.

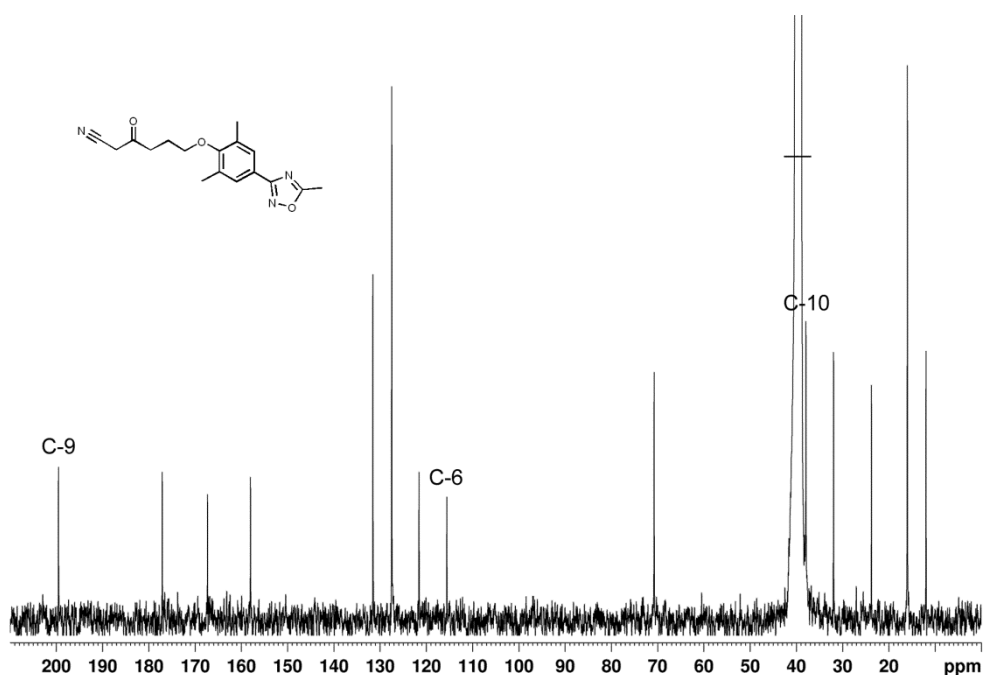

Figure S6. <sup>13</sup>C NMR spectrum of the ring-opening product β-keto nitrile derivative **3** in DMSO-d<sub>6</sub> at 30°C. Carbons C-6, C-9 and C-10 have been highlighted in the spectrum (see numbering in Scheme S2).
